# Supplementary material
Source: HighWire-hosted journal article supplement (https://bibliotheek.ehb.be/content/100/1/31)

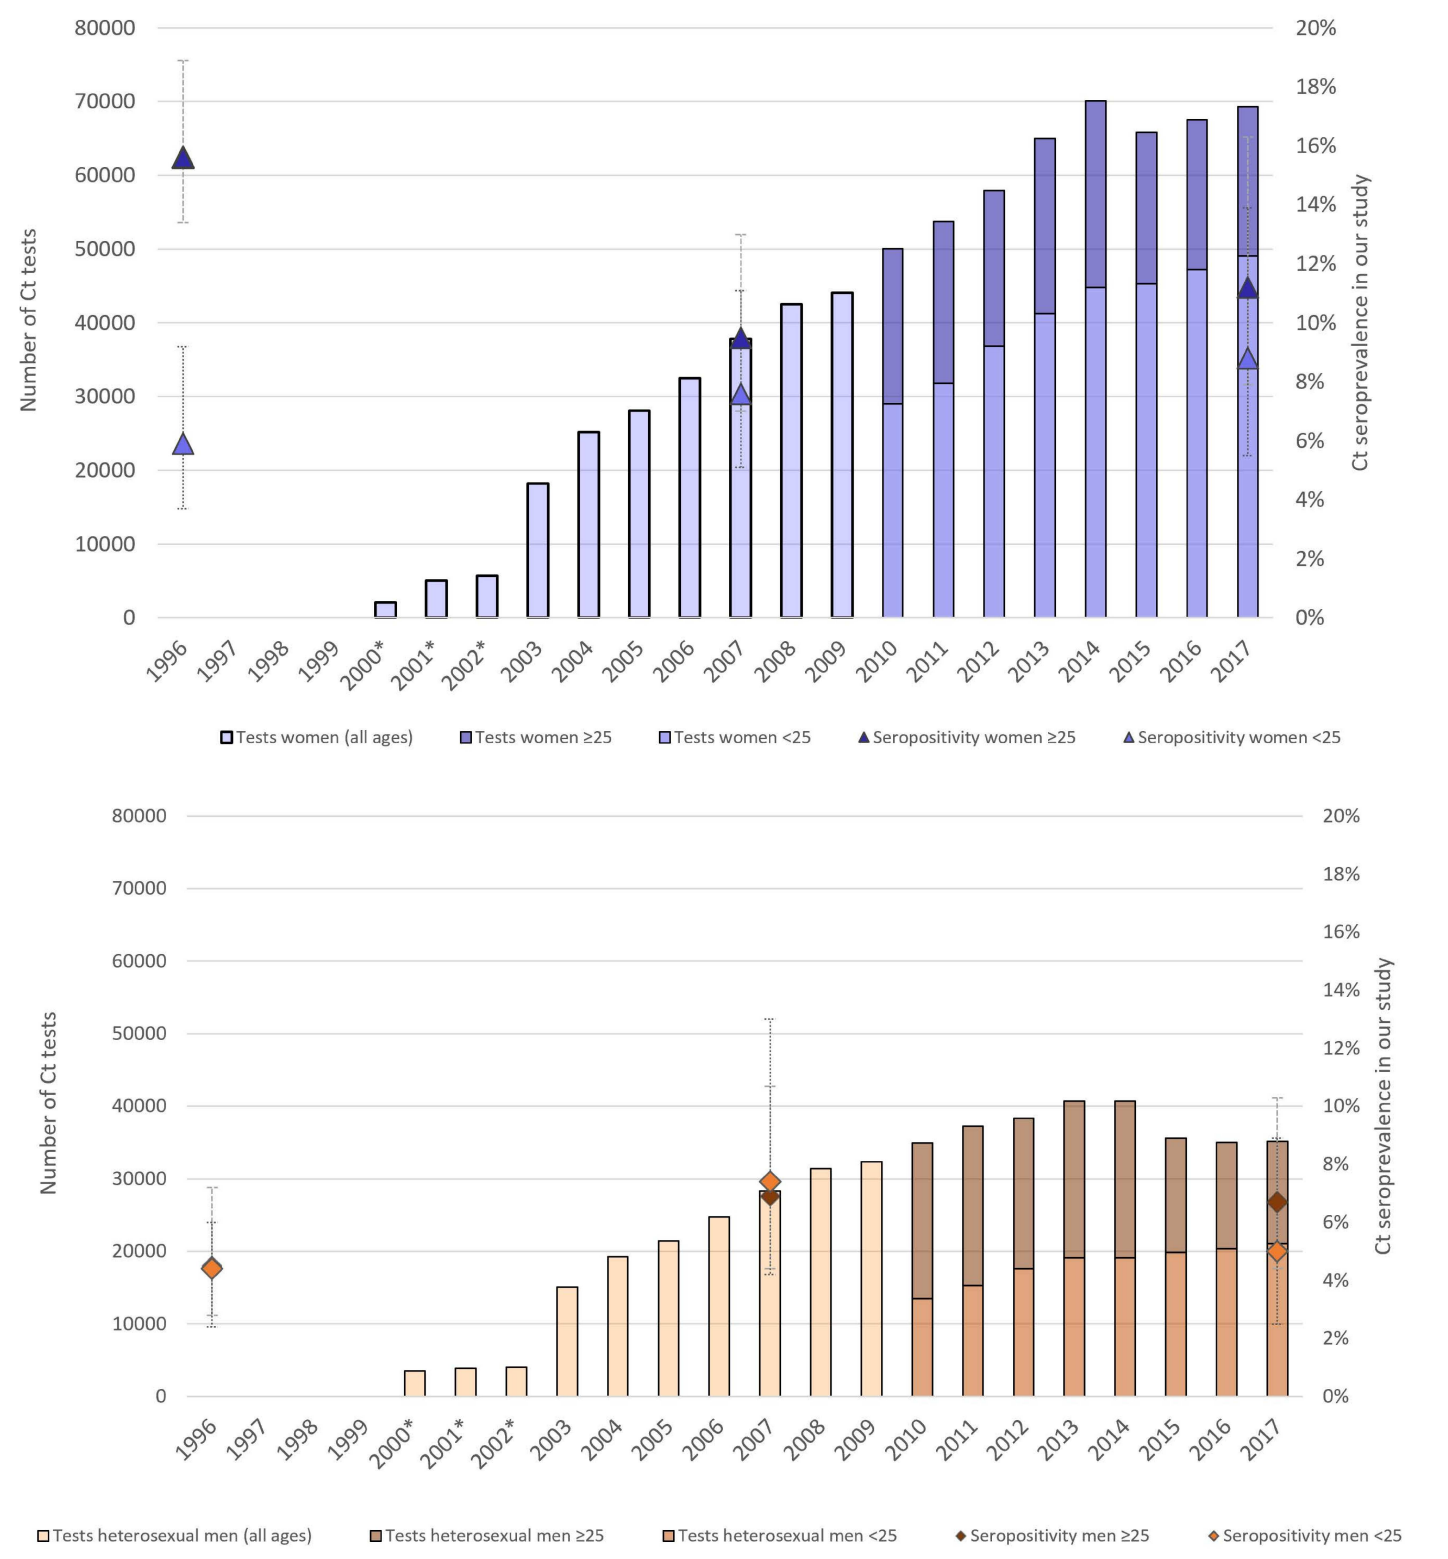

Supplement: inline-supplementary-material-3 [file inline-supplementary-material-3.pdf]
